# Supplementary material for: 4,4′,4′′-Triaminotriphenylamine-based porous polyimide as a visible-light-driven photocatalyst
Source: Royal Society of Chemistry journal article supplement (doi:10.1039/c8nj02173b), 2018-01-01
Supplement: c8nj02173b1.pdf [file c8nj02173b1.pdf]

## Supporting Information

### 4,4',4''-triaminotriphenylamine-based porous polyimide as visible-light-driven photocatalysts

Qin Wang, Jianling Zhang, Yuyan Yu, Yi Dan\*, Long Jiang\*

State Key Laboratory of Polymer Materials Engineering of China (Sichuan University), Polymer Research Institute of Sichuan University, Chengdu 610065, China

E-mail: [danyi@scu.edu.cn](mailto:danyi@scu.edu.cn), [jianglong@scu.edu.cn](mailto:jianglong@scu.edu.cn)

\*Corresponding author

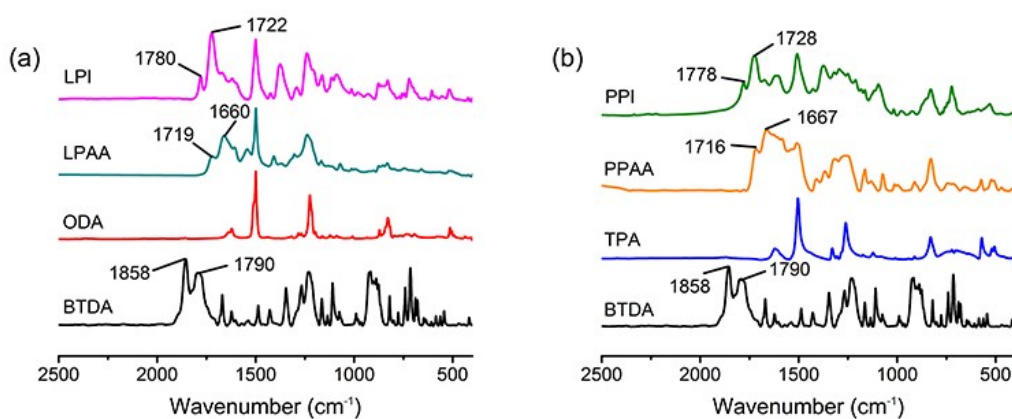

Fig. S1. FT-IR spectra of (a) ODA, BTDA, LPAA and LPI; (b) TPA, BTDA, PPAA and PPI.

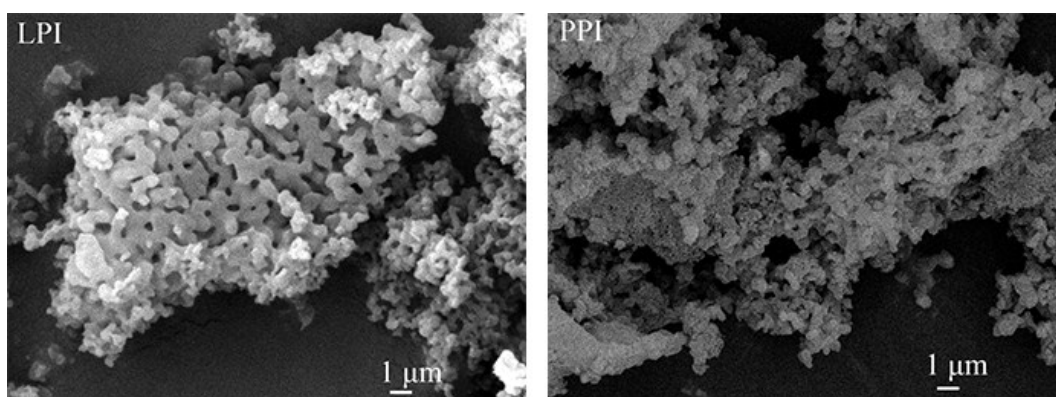

Fig. S2. The low magnification SEM images of LPI and PPI.

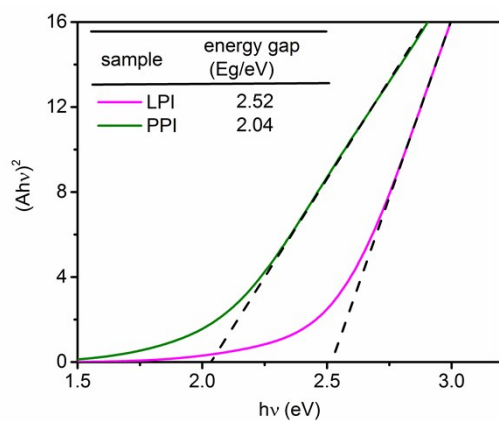

Fig. S3. The Tauc plot of LPI and PPI with the band gap shown in inset.

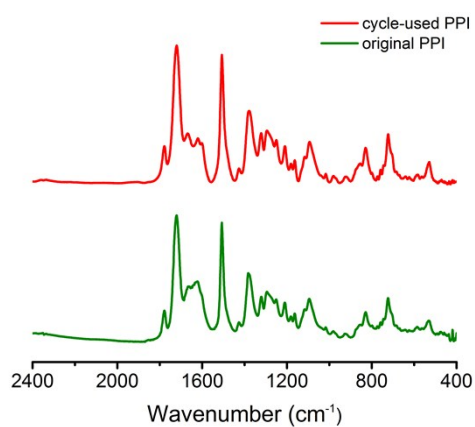

Fig. S4. FT-IR spectra of cycle-used PPI and original PPI.

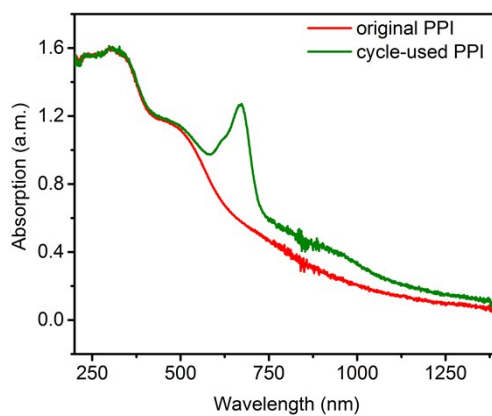

Fig. S5. UV-vis absorption spectrum of cycle-used PPI and original PPI.
